# Supplementary material for: Facile synthesis of a nanorod-like MoS2 nanostructure for sensitive electrochemical biosensing application
Source: Royal Society of Chemistry journal article supplement (doi:10.1039/d0an01553a), 2020-01-01
Supplement: d0an01553a1.pdf [file d0an01553a1.pdf]

Electronic Supplementary Information (ESI) for Chemical Communications

This journal is (c) The Royal Society of Chemistry 2020

**Facile synthesis of daisy-like MoS<sub>2</sub> nanostructure for sensitive electrochemical biosensing application**

Zhongfang Hu,<sup>a</sup> Rong Xu,<sup>a</sup> Suhua Yu,<sup>b</sup> Juan Li,<sup>a,\*</sup> Zhanjun Yang<sup>a,b</sup>

<sup>a</sup>*School of Chemistry and Chemical Engineering, Guangling College, Yangzhou University, Yangzhou 225002, P.R. China*

<sup>b</sup>*Guangling College, Yangzhou University, Yangzhou 225002, PR China.*

**Effects of solution scan rate and pH on the electrochemical behavior at the GOx/MoS<sub>2</sub>/chitosan modified GCE.**

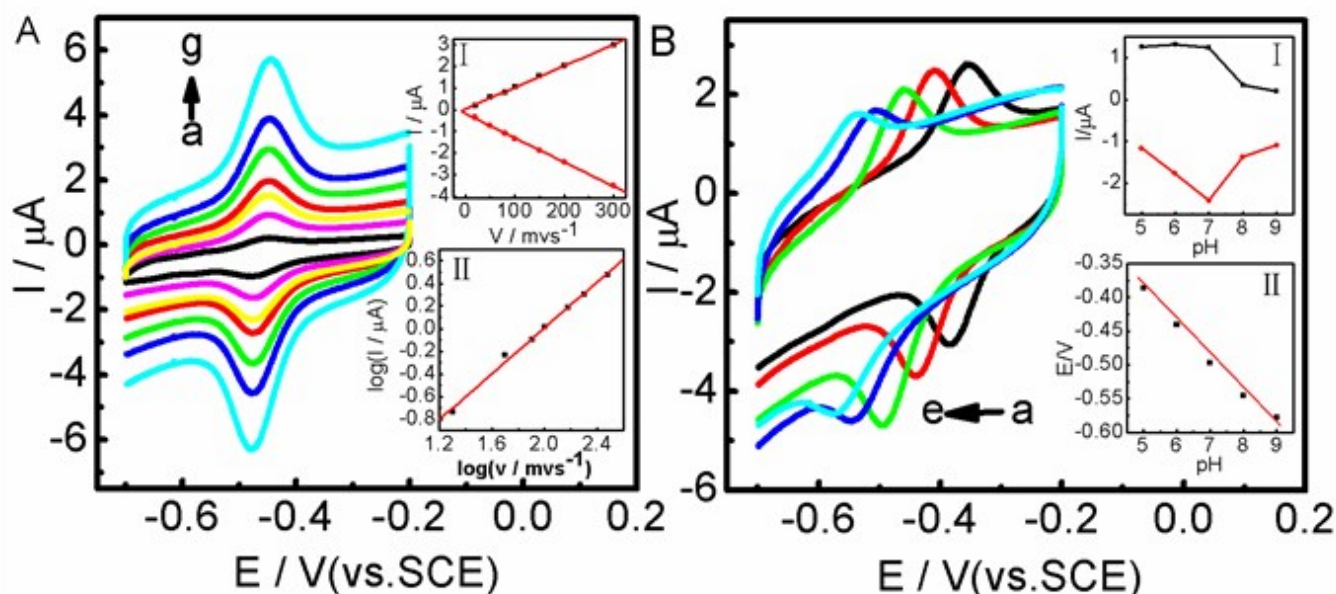

**Figure S1** (A). Cyclic voltammograms of GOx/MoS<sub>2</sub>/chitosan in 0.1 M N<sub>2</sub>-saturated PBS (pH=7.0) at 10, 20, 50, 80, 100, 150 and 200 mV s<sup>-1</sup> (a-g), inset I: plot of anodic and cathodic peak currents vs. scan rates, inset II: plot of logarithm of ipc vs. logarithm of V and (B) cyclic voltammograms of GOx/MoS<sub>2</sub>/chitosan in N<sub>2</sub>-saturated PBS with different pH values of 5.0, 6.0, 7.0, 8.0 and 9.0 at a scan rate of 100 mV s<sup>-1</sup> (a-e), inset I: plot of anodic and cathodic peak currents vs. pH, inset II: plot of formal potentials vs. pH.

**Comparison between this glucose biosensor and others previous glucose biosensors reported in recent literatures.**

**Table S1 Comparison of analytical performance between GOx/nanorod-like MoS<sub>2</sub>/CS/GCE and other modified electrodes**

| Electrode                                          | Applied potential (V) | Sensitivity (mA M <sup>-1</sup> cm <sup>-2</sup> ) | Detection limit (mM) | Linear range (mM)         | Reference |
|----------------------------------------------------|-----------------------|----------------------------------------------------|----------------------|---------------------------|-----------|
| GOx/ nanorod-like MoS <sub>2</sub> / chitosan /GCE | -0.45                 | 25.06                                              | 0.005                | 0.015-0.325<br>0.325-1.43 | This Work |
| GOx/CoS-MWCNTs/Nafion/GCE                          | -0.43                 | 14.96                                              | 0.005                | 0.008-1.5                 | S1        |
| GOx/SnS <sub>2</sub> /Nafion/GCE                   | -0.45                 | 7.6                                                | 0.01                 | 0.025-1.1                 | S2        |
| Nifion/GOx/silver-ZnO/GCE                          | -0.37                 | 18.7                                               | 0.007                | 0.01-1.5                  | S3        |
| GOx/cage-like PbS/Nafion/GCE                       | -0.45                 | 11.02                                              | 0.01                 | 0.15-1.45                 | S4        |
| GOx/CNT–AuNPs–ZnSHSs/GCE                           | +0.50                 | –                                                  | 0.01                 | 0.02-7.0                  | S5        |
| GOx/G-CdS/GCE                                      | -0.335                | 1.76                                               | 0.7                  | 2-16                      | S6        |
| GOD/chitosan/ $\alpha$ -ZrP                        | -0.435                | –                                                  | 0.076                | 0.25-0.8                  | S7        |

*MWCNTs: Multi-walled carbon nanotubes*

*G: graphene*

*AuNPs: Au nanoparticles*

*HSs: hollow spheres*

*HNPs: Hybrid nanorods*

S1. J. Li, Y. Liu, X. Tang, L. J. Xu, L. F. Min, Y. D. Xue, X. Y. Hu, Z. J. Yang, *Microchim. Acta*, 2020, **187**, 80.

S2. Z. J. Yang, Y. Y. Ren, Y. C. Zhang, J. Li, H. B. Li, X. C. Huang, X. Y. Hu, Q. Xu, *Biosens. Bioelectron.*, 2011, **26**, 4337-4341.

S3. J. Li, M. M. Lu, Z. N. Tan, Y. B. Xu, Y. C. Zhang, X. Y. Hu, Z. J. Yang, *Microchim. Acta*, 2016, **183**, 1705-1712.

S4. J. Li, Y. Tang, J. Yang, Z. J. Yang, Y. C. Zhang, X. Y. Hu, *Sens. Actuators, B: Chem.*, 2014, **190**, 549-554.

S5. Y. Shuai, C. Liu, J. Wang, X. Cui, L. Nie, *Analyst*, 2013, **138**, 3259-3263.

S6. K. Wang, Q. Liu, Q. M. Guan, J. Wu, H. N. Li, J. J. Yan, *Biosens. Bioelectron.*, 2011, **26**, 2252-2257.

S7. L. M. Liu, J. W. Wen, L. J. Liu, D. Y. He, R. Y. Kuang, T. Q. Shi, *Anal. Biochem.*, 2013, **445**, 24-29.
